# Supplementary material for: Regional sequencing collaboration reveals persistence of the T12 Vibrio cholerae O1 lineage in West Africa
Source: eLife. 2021 Jun 18;10:e65159. doi: 10.7554/eLife.65159 (PMC8213408; doi:10.7554/eLife.65159)
Supplement: Figure 2—source data 1. [file elife-65159-fig2-data1.xlsx]

## Sheet: Sheet1
Isolate name	Input (ng)	Reads	Filtered Reads	Median depth	% Genome
CMR_VC_06	547	207688	39833	1900-07-07	98.49
CMR_VC_07	730	181223	34798	1900-07-08	98.52
CMR_VC_14	864	239145	35697	1900-07-08	98.66
CMR_VC_16	682	161542	36632	1900-07-07	98.5
CMR_VC_22	701	162693	45977	1900-07-06	98.38
CMR_VC_28	672	227665	35486	1900-07-07	98.53
CMR_VC_29	629	197979	35954	1900-07-09	98.4
CMR_VC_30	514	202379	34450	1900-07-09	98.66
CMR_VC_31	869	201198	38790	1900-07-06	98.65
CMR_VC_33	562	183289	34638	1900-07-07	98.28
CMR_VC_34	557	225793	36562	1900-07-05	98.64
CMR_VC_44	571	220076	37075	1900-07-07	98.56
CMR_VC_48	281	214665	39616	1900-07-06	98.65
CMR_VC_50	878	191549	43362	1900-07-06	98.64
CMR_VC_56	763	148347	37772	1900-07-08	98.43
CMR_VC_57	696	214238	38543	1900-07-08	98.61
NER_003_2018	1000	507925	53801	1900-07-07	98.67
NER_004_2016	NR	755430	46495	1900-07-09	98.67
NER_004_2018	NR	547395	39958	1900-07-10	98.5
NER_005_2018	1000	417310	73504	1900-07-06	98.7
NER_023_2018	1000	569906	50011	1900-07-08	98.71
NER_024_2018	NR	432581	41829	1900-07-09	98.51
NER_028_2011	100	810648	68630	1900-07-07	98.66
NER_055_2011	NR	564991	48850	1900-07-08	98.67
NER_071_2011	1000	606046	79913	1900-07-05	98.69
NER_088_2011	869	581959	57664	1900-07-06	98.67
NER_109_2011	1000	574962	60997	1900-07-05	98.67
NER_116_2011	NR	328397	40535	1900-06-17	98.33
NER_132_2012	NR	435457	38870	1900-07-09	98.64
NER_205_2011	672	609444	67305	188	98.71
NER_211_2018	1000	404931	73957	187	98.69
NGA_001_2019	931	255456	31260	1900-07-07	98.37
NGA_002_2019	806	237071	44708	1900-07-05	98.57
NGA_016_2019	1000	247802	52779	1900-07-05	98.68
NGA_201_2018	1000	230992	44679	1900-07-05	98.69
NGA_205_2018	845	227730	47009	1900-06-27	98.65
NGA_206_2018	662	207186	42548	1900-06-26	98.66
NGA_220_2018	1000	189506	36753	1900-07-06	98.43
NGA_235_2018	835	212584	38367	1900-07-09	98.46
NGA_236_2019	898	222086	44815	1900-07-04	98.65
NGA_247_2018	1000	149028	41192	1900-07-05	98.54
NGA_248_2018	811	270077	41048	1900-07-04	95.65
NGA_255_2018	893	242740	32161	1900-07-09	98.48
NGA_263_2018	514	264190	51864	1900-07-04	98.67
NR, not recorded. Percent genome, fraction of the N16961 reference genome covered by at least 100x read depth.
