# Supplementary material for: Regional sequencing collaboration reveals persistence of the T12 Vibrio cholerae O1 lineage in West Africa
Source: eLife. 2021 Jun 18;10:e65159. doi: 10.7554/eLife.65159 (PMC8213408; doi:10.7554/eLife.65159)
Supplement: Figure 2—source data 2. [file elife-65159-fig2-data2.xlsx]

## Sheet: Sheet1
Continent	1957–1979	1980–1989	1990–1999	2000-2009	2010-2017
Africa	70	47	238	209	211
America	0	0	44	2	8
Asia	72	29	78	91	153
Europe	15	2	8	0	0
Other/Unknown	2	0	0	0	0
Region	1957–1979	1980–1989	1990–1999	2000-2009	2010-2017
Central Africa	16	11	77	46	104
Eastern Africa	5	8	76	92	75
Northern Africa	16	7	14	0	0
Southern Africa	0	3	1	19	0
Western Africa	33	18	70	52	32a
Country	1957–1979	1980–1989	1990–1999	2000-2009	2010-2017
Cameroonb	6	0	20	13	6c
Niger	2	0	5	6	2
Nigeria	2	0	7	6	7
a Latest sequence from Western Africa included in study is from 2014
b According to the WHO region definitions used in the regional table, Cameroon is in Central Africa
c Latest sequence from Cameroon included in study is from 2011
